# Supplementary material for: High Prevalence of Microsporidia in the North African Hedgehog (Atelerix algirus) in the Canary Islands, Spain
Source: MDPI journal article supplement (doi:10.3390/ani13111756), 2023-05-25
Supplement: s1 [file s1]

**Table S1.** Microsporidia detected in hedgehog (*Atelerix algirus*) fecal samples and location in the Canary Islands (Spain).

| Sample ID | Location                   | Origin <sup>1</sup> | Sex    | Microsporidia                   |
|-----------|----------------------------|---------------------|--------|---------------------------------|
| AA1       | Arona                      | WRC                 | -      | <i>E. bieneusi</i> <sup>2</sup> |
| AA2       | Santa Cruz de Tenerife     | WRC                 | -      | <i>E. cuniculi</i> (I)          |
| AA4       | San Cristóbal de La Laguna | WRC                 | -      | -                               |
| AA5       | San Cristóbal de La Laguna | WRC                 | -      | -                               |
| AA6       | Adeje                      | WRC                 | -      | Undetermined                    |
| AA7       | San Cristóbal de La Laguna | WRC                 | -      | -                               |
| AA8       | San Cristóbal de La Laguna | WRC                 | -      | Undetermined                    |
| AA9       | El Rosario                 | WRC                 | Male   | -                               |
| AA10      | Arafo                      | WRC                 | Male   | -                               |
| AA11      | Arona                      | WRC                 | Female | <i>E. bieneusi</i> (AAE1)       |
| AA12      | Santa Cruz de Tenerife     | WRC                 | Male   | -                               |
| AA13      | Güímar                     | WRC                 | Male   | -                               |
| AA14      | Santa Cruz de Tenerife     | WRC                 | -      | <i>E. bieneusi</i> (AAE1)       |
| AA15      | Icod de Los Vinos          | WRC                 | Female | -                               |
| AA16      | Arona                      | WRC                 | -      | <i>E. bieneusi</i> (AAE1)       |
| AA17      | San Cristóbal de La Laguna | WRC                 | Male   | Undetermined                    |
| AA19      | Granadilla de Abona        | WRC                 | Male   | <i>E. bieneusi</i> (AAE1)       |
| AA20      | El Sauzal                  | WRC                 | Male   | <i>E. bieneusi</i> (AAE2)       |
| AA21      | Santa Cruz de Tenerife     | WRC                 | Female | <i>E. bieneusi</i> (AAE1)       |
| AA22      | San Cristóbal de La Laguna | WRC                 | Male   | -                               |
| AA23      | Arona                      | WRC                 | Male   | -                               |
| AA24      | Granadilla de Abona        | WRC                 | Female | -                               |
| AA25      | Tacoronte                  | WRC                 | Female | <i>E. bieneusi</i> (AAE2)       |
| AA26      | Arona                      | WRC                 | Male   | <i>E. bieneusi</i> (AAE1)       |
| AA27      | Arona                      | WRC                 | Male   | <i>E. bieneusi</i> (AAE1)       |
| AA28      | San Miguel de Abona        | WRC                 | Female | -                               |
| AA29      | Arona                      | WRC                 | Male   | <i>E. bieneusi</i> (AAE1)       |
| AA30      | Tacoronte                  | WRC                 | Female | <i>E. bieneusi</i> (AAE2)       |
| AA31      | Granadilla de Abona        | WRC                 | Female | <i>E. bieneusi</i> (AAE1)       |
| AA32      | Las Palmas de Gran Canaria | Found dead          | Female | <i>E. bieneusi</i> (AAE1)       |
| AA33      | Las Palmas de Gran Canaria | Found dead          | -      | <i>E. bieneusi</i> (AAE1)       |
| AA34      | Las Palmas de Gran Canaria | Found dead          | Female | <i>E. bieneusi</i> (AAE1)       |
| AA35      | El Rosario                 | WRC                 | Female | <i>E. bieneusi</i> (AAE1)       |
| AA36      | El Rosario                 | WRC                 | -      | <i>E. cuniculi</i> (I)          |
| AA37      | San Cristóbal de La Laguna | WRC                 | -      | -                               |
| AA39      | Santa Cruz de Tenerife     | WRC                 | -      | -                               |

<sup>1</sup> WRC = wildlife recovery center; <sup>2</sup> The sample was not successfully genotyped.
